# Supplementary material for: Association of multiple tumor markers with newly diagnosed gastric cancer patients: a retrospective study
Source: PeerJ. 2022 May 19;10:e13488. doi: 10.7717/peerj.13488 (PMC9124459; doi:10.7717/peerj.13488)
Supplement: Supplemental Information 2 [file peerj-10-13488-s002.xlsx]

## Sheet: Sheet
Number	Female=1	Age	AFP	NSE	FER	CEA	CA-125	CA153	CA199	CA242	Gastric Cancer=1	M1=distant metastasis
1	0	69	1.88	2.51	123.34	1.51	8.28	5.02	16.07	4.86	1	0
2	0	66	0.24	6.54	86.54	1	349.54	3.8	2.49	2.78	1	0
3	0	61	0.91	2.02	14.89	0.76	3.27	2.23	4.85	1.91	1	0
4	0	60	1.51	2.65	310.91	0.81	9.04	4.12	3.91	1.9	1	0
5	1	73	0.24	2.82	93.93	0.91	3.28	2.16	7.72	1.73	1	0
6	0	46	0.28	2.85	151.23	1.63	4.15	3.53	28.32	14.58	1	0
7	0	55	157.64	2.35	5.63	2.04	3.3	4.06	12.88	2.32	1	0
8	0	68	3.63	6.3	412.79	23.14	27.88	8.01	88.12	50.17	1	1
9	0	48	1.18	4.48	116.99	0.58	5.54	5.46	8.89	2.82	1	0
10	0	57	8.06	28.78	506.31	8.89	41.53	28.46	455.13	176.83	1	1
11	0	65	0.24	3.42	11.5	0.56	4.84	6.28	9.9	2.45	1	0
12	1	77	0.24	10.21	407.38	0.23	193.71	6.49	2	1.97	1	1
13	0	56	1.01	2.41	150.34	1.32	4.94	5.19	34.74	11.81	1	0
14	0	66	1.18	2.67	11.5	0.61	3.72	3.64	54.98	13.1	1	0
15	0	73	1.26	3.21	51.01	3.36	4.03	3.77	24.11	7.04	1	0
16	0	43	2.37	2.16	6.47	1.1	55.55	3.72	38.39	2.03	1	1
17	1	56	4.39	7.36	435.93	60	500	43.01	285.14	89.03	1	1
18	0	44	0.49	2.61	185.71	1.02	6.7	3.48	2	1.15	1	0
19	0	59	3.02	18.28	97	3.51	13.21	5.12	123.2	19.48	1	1
20	0	65	0.91	1.97	108.36	1.1	7.34	17.58	2.99	1.92	1	0
21	1	66	0.86	2.74	87.99	1.1	9.18	6.68	14.24	4.69	1	0
22	1	65	3.57	2.07	117.41	3.6	7.14	4.81	180.88	42.17	1	0
23	0	76	0.29	2.04	87.91	0.96	5.83	1.77	21.78	3.81	1	0
24	0	65	300	1.87	17.73	2.23	9.92	2.5	15.91	3.34	1	0
25	1	51	0.24	2.52	73.75	2.25	162.27	7.5	3.66	2.47	1	1
26	0	65	0.24	1.44	13.57	2.82	2.15	1.67	3.12	1.15	1	0
27	0	45	0.29	2.55	10.94	1.25	5.22	4.06	7.46	1.71	1	0
28	0	73	7.11	3.21	260.83	11.04	43.75	7.62	400	85.24	1	1
29	0	56	0.61	2.3	56.96	1.35	4.63	3.7	7.43	2.4	1	1
30	0	77	6.77	5.04	439.23	60	500	10.85	2.96	4.38	1	0
31	0	47	0.24	2.12	112.86	0.83	9.78	3.1	3.45	1.38	1	1
32	0	43	5.17	3.46	57.75	1.65	30.81	8.71	188.6	56.41	1	1
33	0	69	0.24	1.85	116.73	1.27	4.05	5.08	6.32	2.93	1	0
34	0	56	259.8	3.66	11.37	56.96	8.64	3.06	108.7	29.62	1	1
35	0	62	1.3	3.12	159.99	1.18	5.98	4.98	3.93	1.65	1	0
36	0	54	0.24	1.39	127.61	0.34	8.03	5.44	6.64	2.01	1	0
37	0	69	1.26	2.16	293.21	2.21	8.44	4	19.31	13.95	1	0
38	1	28	1.53	3.03	48.11	0.9	5.72	3.18	21.76	9.92	1	1
39	0	66	1.07	2.21	97.62	1.51	8.91	1.73	14.3	2.83	1	0
40	1	53	0.63	2.94	30.91	1.91	5.43	16.51	14.02	3.55	1	0
41	0	38	1.83	1.99	123.42	0.65	4.17	6.02	6.99	2.96	1	0
42	0	45	1.19	2.86	96.04	1.66	4.48	5.76	3.61	1.8	1	0
43	0	77	2.57	2.17	10.35	3.49	2.06	2.92	13.83	2.96	1	0
44	1	61	1.1	2.59	121.81	0.67	8.14	4.26	23.49	5.52	1	1
45	0	67	1.98	2.72	181.93	1.37	6.55	4.09	13.41	3.56	1	0
46	1	48	1.95	3.19	2.21	0.63	7.29	3.01	5.21	2.08	1	0
47	1	48	0.24	2.08	163.85	0.47	5.2	3.61	13.33	3.15	1	0
48	1	55	1.67	1.92	4.95	1.22	3.72	3.57	11.08	2.78	1	0
49	0	64	1.19	2.64	6.77	1.84	2.85	3.8	4.08	2	1	1
50	1	54	1.59	2.09	31.54	4.81	3.3	1.52	6.75	1	1	0
51	0	75	0.92	2.17	179.45	0.71	5.45	4.62	7.29	2.99	1	0
52	0	83	4.33	3.86	73	1.43	9.4	3.39	23.64	8.68	1	0
53	0	46	1.36	2.49	49.37	1.13	3.69	4.29	13.37	2.77	1	0
54	0	85	0.34	2.53	500.65	0.64	11.3	2.71	7.55	2.33	1	1
55	0	73	5.2	2.64	195.36	11.24	11.59	3.16	286.2	187.52	1	0
56	0	54	0.24	3.1	242.85	1.75	7.15	2.61	7.15	4.28	1	0
57	0	53	0.24	2.73	47.15	1.15	4.39	3.37	8.08	2.33	1	0
58	0	71	1.44	2.12	8.43	0.98	3.02	3.02	4.52	1.51	1	1
59	0	45	179.14	2.86	486.19	52.79	20.03	5.02	25.44	5.44	1	1
60	0	68	2.41	8.96	97.02	42.12	59.98	176.79	400	200	1	1
61	0	60	0.41	2.79	111.05	2.02	6.44	8.28	8.59	5.3	1	0
62	0	52	1.88	4.34	134.52	2.02	14.68	8.64	9.24	4.44	1	0
63	0	77	1.07	3.07	9.84	0.75	3.55	4.53	7.67	3.02	1	0
64	0	67	0.24	1.4	116.77	0.63	4.75	4.07	2.83	1	1	1
65	1	47	3.75	2.71	26.29	2.69	8.32	6.9	23.94	8.1	1	0
66	0	66	0.95	2.09	7.63	7.68	5.9	2.23	33.12	12.16	1	0
67	0	68	3.24	3.27	181.75	3.06	9.1	3.26	11.32	3.25	1	0
68	0	66	0.64	3.15	13.09	1.15	10.02	4.25	2	2.05	1	0
69	0	50	0.24	2.5	195.44	0.3	7.59	5.19	9.95	4.42	1	0
70	0	56	1.4	5.96	213.72	0.94	20.82	6.83	7.68	5.14	1	0
71	0	78	0.53	3.92	99.41	1.74	5.97	15.33	11.7	5.16	1	0
72	1	55	0.24	2.33	114.11	0.49	6.72	4.49	8.45	2.93	1	0
73	0	53	0.24	2.41	192.05	1.46	7.14	4.6	5.25	3.5	1	0
74	1	79	0.24	1.99	203.26	0.28	7.75	2.68	5.98	2.18	1	0
75	0	43	0.24	2.69	233.27	0.73	5.71	5.02	3.61	2.57	1	0
76	0	58	0.24	5.37	221.26	0.54	11.36	3.63	2	1.23	1	0
77	1	52	0.61	2.27	9.38	0.53	2.27	2.96	2.96	1.45	1	0
78	0	71	0.24	2.18	169.92	1.09	7.32	14.11	5.22	2.52	1	0
79	0	61	0.24	3.42	460.02	1.5	339.42	20.57	3.86	2.71	1	1
80	0	64	1.07	1.97	51.32	4.83	4.63	3.63	2	1.76	1	0
81	0	63	0.24	2.97	259.01	0.33	8.58	7.92	6.47	1.62	1	0
82	0	69	1.73	2.35	14.69	2.06	5.1	10.02	38.58	19.4	1	0
83	0	48	0.24	1.61	16.58	0.24	3.33	2.02	2.21	1.12	1	0
84	0	57	0.45	1.84	11.51	2.21	3.85	3.15	12.27	4.11	1	0
85	0	67	0.87	3.14	13.59	1.19	5.96	4.13	3.93	2.44	1	0
86	0	58	1.35	3.08	11.13	0.6	4.28	5.01	9.51	2.19	1	0
87	0	71	5.39	3.84	508.74	2.1	29.59	6.94	167.83	87.76	1	0
88	0	68	8.85	3.75	62.14	2.58	19.36	4.05	20.29	4.85	1	0
89	0	41	0.24	3.39	205.26	0.82	11.52	15.67	8.28	2.67	1	0
90	1	51	0.56	1.46	111.29	1.19	4.93	3.11	2.35	1.47	1	0
91	0	57	0.47	2.71	251.28	6.47	48.79	4.4	22.03	12.05	1	0
92	0	61	0.52	3.62	69.32	0.54	4.57	7.55	10.69	1.92	1	0
93	0	56	1.25	2.57	7.15	1.5	2.53	4.62	19.54	5.13	1	0
94	0	54	0.96	1.85	75.21	4.07	5.46	5.43	2	1.36	1	0
95	0	39	0.6	2.54	183.17	2.18	8.95	12.82	9.24	2.4	1	0
96	0	61	2.13	2.03	8.89	4.7	12.35	2.61	48.42	17.6	1	0
97	0	67	1.21	2.41	192.49	1	10.27	4.37	16.99	2.02	1	0
98	1	33	1.66	3.02	17.6	0.86	437.33	2.64	113.08	10.33	1	1
99	0	66	2.22	1.65	258.02	0.65	8.8	5.14	92.18	30.78	1	0
100	0	78	0.44	2.65	267.62	0.93	3.8	3.01	6.75	1.83	1	0
101	0	62	2.56	2.24	53.86	0.77	32.63	2.8	52.63	11.94	1	1
102	0	48	0.33	2.03	510.72	0.59	15.62	24.91	4.46	2.46	1	0
103	0	62	1.37	3.02	29.84	2.93	6.49	3	14.1	2.19	1	0
104	0	77	0.51	1.68	20.13	2.19	1.66	9.14	21.82	6.49	1	0
105	1	65	0.87	3.15	519.46	0.55	18.39	5.61	26.44	5.45	1	0
106	1	66	0.85	2.41	73.76	1.49	127.15	8.07	8.35	1.97	1	1
107	0	44	2.57	1.68	149.04	0.8	3.61	3.55	5.35	3.31	1	0
108	0	60	0.97	2.06	200.18	1.38	6.48	6.93	9.41	4.58	1	0
109	1	54	0.24	2.47	22.64	6.37	269.75	19.98	3	2.04	1	1
110	1	58	0.24	5.28	68.97	0.55	500	5	2	2.83	1	1
111	0	54	5.39	2.74	203.32	1.47	8.6	5.29	9.93	4.35	1	0
112	0	67	3.45	57.47	505.33	60	214.15	23.48	114.54	7.87	1	1
113	1	57	0.24	2.87	36.23	1.38	5.49	5.36	2	1	1	0
114	1	56	0.24	2.12	146.31	3.94	4.06	5.34	3.42	1.28	1	0
115	0	71	0.73	2.56	42.33	0.36	8.05	1.08	3.64	1.22	1	0
116	0	64	0.31	1.76	271.06	0.68	11.83	3.44	2	1.15	1	0
117	1	47	2.31	7.07	78.05	1.38	11.63	6.88	400	151.77	1	1
118	0	61	1.21	1.62	8.74	1.51	4.84	4.46	9.13	3.99	1	0
119	0	74	0.85	2.23	20.37	4.21	58.72	6.2	11.61	5.27	1	1
120	0	64	1.73	6.45	429.93	47.48	155.74	15.94	400	121.77	1	1
121	0	52	1.41	2.61	174.78	1.05	4.11	4.49	4.33	1.75	1	0
122	1	63	0.24	2.62	144.21	0.9	5.29	6.78	4.44	1.4	1	0
123	0	48	1.08	3.51	75.4	0.5	5.21	2.67	4.43	2.41	1	0
124	1	43	0.53	1.65	9.76	2.2	4.82	4.32	2.27	1.25	1	0
125	0	44	1.54	3.27	99.53	1.12	4.48	5.51	7.18	3.63	1	0
126	0	60	7.74	3.81	63.46	45.85	245.35	19.29	79.9	31.21	1	1
127	0	16	3.98	2.92	86.22	3.83	30.42	1.13	14.33	2.63	1	1
128	0	53	0.41	2.59	259.85	3.07	15.71	11.76	4.99	2.32	1	0
129	0	54	0.24	1.67	77.84	0.55	4.86	1.89	11.24	3.87	1	0
130	1	45	0.24	2.42	89.52	0.62	6.9	8.15	4.42	2.6	1	0
131	0	63	0.49	2.43	26.03	0.83	3.77	2.34	6.24	2.49	1	0
132	1	53	2.98	3.94	61.91	24.15	54.19	6.03	49.19	23.27	1	0
133	1	70	0.32	2.12	18.04	0.52	2.94	7.17	2.6	1	1	0
134	0	64	2.32	1.59	233.54	26.78	5.29	5.11	14.21	5.83	1	0
135	0	73	7.11	1.69	16.46	8.15	18.52	5.73	172.7	91.22	1	0
136	0	59	4.54	3.72	273.64	2.74	102.42	2.29	400	160.21	1	1
137	0	71	0.36	1.84	21.53	0.56	1.43	6.55	3.29	1.36	1	0
138	1	68	0.24	1.84	200.98	1.43	8.69	4.49	6.69	2.88	1	0
139	0	63	2.9	2.1	13.64	0.82	5.41	1.66	61.49	11.75	1	1
140	0	55	0.24	2.02	169.33	0.34	352.87	22.94	10.87	2.02	1	1
141	0	50	0.24	2.17	11.57	0.32	4.33	3.39	2	1	1	0
142	0	56	0.24	1.26	81.68	0.36	4.34	5.26	5.33	1.71	1	0
143	1	51	0.24	2.12	3.89	0.44	11.43	9.35	5.83	1.42	1	0
144	0	53	0.93	2.52	65.76	2.27	4.92	4.47	10.38	3.52	1	0
145	0	51	0.24	2.79	244.08	1.12	4.5	3.5	16.45	6	1	0
146	1	78	7.96	2.38	55.73	10.01	277.35	12.53	400	200	1	1
147	1	64	2.55	8.11	66.24	51.95	69.5	66.19	400	200	1	1
148	0	75	10.29	10.67	37.06	36.44	124.81	9.97	361.24	169.19	1	1
149	0	74	2.12	2.57	249.13	2.85	8.98	5.92	11	3.57	1	0
150	1	66	1.38	2.37	16.49	0.83	104.78	2.63	10.42	1.87	1	1
151	0	78	0.24	2.62	411.74	0.75	7.01	2.9	7.61	2.34	1	0
152	0	61	2.9	2.07	20.92	1.5	6.88	2.15	54.17	19.16	1	0
153	0	68	2.71	1.65	12.73	7.92	3.94	2.35	10.51	2.88	1	0
154	0	83	4.16	2.25	10.1	1.43	10.94	2.89	10.2	3.21	1	0
155	0	74	5.28	1.77	112.12	5.09	16.7	3.42	133.91	49.24	1	1
156	1	49	6.23	1.79	14.29	0.49	1.9	3.08	7.83	2.35	1	0
157	0	60	2.13	1.65	17.28	2.85	7.77	1.8	10.32	2.7	1	0
158	0	48	1.98	1.97	14.7	1.54	18.4	5.83	12.75	3.69	1	0
159	0	56	6.85	11.38	381.03	60	431.47	29.06	400	177.97	1	1
160	0	59	2.18	2	4.36	0.95	3.26	12.53	21.4	7.37	1	0
161	1	67	1.13	3.07	30.67	1.29	8.01	4.17	11.43	5.29	1	1
162	0	63	9.65	3.92	108.41	25.87	61.57	30.76	394.42	162.02	1	0
163	0	70	1.28	2.55	91.7	1.7	4.62	3.03	2.49	1.68	1	0
164	0	51	1.13	3.15	8.28	1.18	5.79	4.44	5.79	2.3	1	0
165	0	68	2.3	4.11	176.23	2.64	6.14	14.42	71.99	25.43	1	0
166	0	56	1.35	3.04	30.49	5.5	11.92	5.24	12.98	4.44	1	0
167	1	68	2.16	2.77	10.36	7.13	4.1	4.71	12.16	3.54	1	0
168	1	60	178.29	8.17	169.37	60	15.52	7.27	56.05	23.11	1	0
169	0	75	1.21	2.51	4	1.93	7.16	3.14	4.39	1.94	1	0
170	0	69	1.01	1.77	100.89	1.36	3.28	4.19	10.68	5.1	1	0
171	0	75	1.18	3.41	32.93	1	5.97	3.05	11.99	3.48	1	0
172	0	65	214.73	6.22	55.79	37.91	32.55	4.19	371.44	57.75	1	1
173	0	62	3.27	2.24	179.88	43.11	7.2	2.58	6.44	2.71	1	0
174	0	67	2.22	3.33	7.82	9.42	35.49	5.84	14.72	6.03	1	1
175	0	68	2.61	3.82	21.22	10.34	373.79	6.31	5.23	2.75	1	1
176	1	47	1.22	1.86	17.24	1.12	9.72	2.43	13.04	5	1	0
177	1	72	0.8	4.19	370.01	0.91	11.36	4.4	9.86	3.82	1	1
178	1	55	1.84	2.39	17.42	1.47	5.08	9.69	23.89	4.84	1	0
179	0	52	1.39	2.62	22.53	1.62	5.35	1.56	8.02	4.22	1	1
180	0	60	1.92	3.42	109.75	1.23	6.65	4.93	13.84	4.72	1	0
181	0	61	7.32	3.13	11.31	12.13	5.6	4.69	200.63	74.14	1	0
182	1	56	3.16	3.33	152.6	1.15	8.53	4.15	6.59	3.15	1	0
183	1	71	1.79	2.82	34.32	1.71	9.39	13.4	3.76	1.98	1	0
184	1	66	1.44	2.43	34.92	3.16	6.94	3.29	3.33	1.49	1	0
185	0	62	2.05	3.27	85.97	1.55	9.44	5.53	14.59	4.84	1	0
186	0	55	2.88	2.88	31.45	1.27	17.46	20.33	3.36	3.09	1	1
187	0	65	1.82	2.54	184.67	1.24	7.76	4.16	3.86	2.37	1	0
188	0	63	2.68	3.8	60.57	10.16	72.8	2.48	31.36	17.35	1	1
189	1	52	1.5	2.22	12.79	0.76	5.69	14.68	13.49	2.52	1	1
190	0	74	1.44	2.02	53.29	1.93	5	9.17	15.64	3.88	1	0
191	0	70	7	4.01	20.01	4.42	18.83	23.16	400	200	1	1
192	0	49	1.83	2.52	77.62	1.36	7.98	5.41	12.35	5.78	1	0
193	0	45	2.07	2.68	153.92	0.96	7.13	12.45	8.05	2.1	1	0
194	1	27	5.63	2.65	9.72	7.69	5.7	5.13	94.79	28.72	1	1
195	0	66	1.73	2.06	82.04	1.02	7.32	1.68	7.67	2.6	1	0
196	1	83	0.65	1.54	11.33	0.98	7.95	8.38	17.53	3.54	1	0
197	1	80	1.4	2.07	140.81	2.12	11.48	4.44	3.17	1.65	1	0
198	0	67	10.07	3.72	100.1	60	39.95	4.96	20.92	10.65	1	1
199	1	61	1.88	1.66	124.16	2.29	25.32	19.69	25.07	6.22	1	0
200	1	60	4.36	2.2	31.44	1.48	139.43	18.7	246.88	133.76	1	1
201	0	43	0.33	2.45	168.39	0.56	8.77	2.04	2.35	1.68	1	0
202	0	64	1.23	2.55	199.99	1.54	9.89	3.76	11.14	5.65	1	0
203	0	64	0.24	3.11	14.33	1	2.1	3.56	2.95	2.37	1	0
204	0	75	1.72	2.28	52.67	2.72	10.52	2.79	2.83	1.57	1	0
205	0	44	4.21	3.36	4.25	1.15	3.09	1.39	100.62	29.45	1	0
206	0	68	1.31	3.48	32.76	1.27	4.71	6.98	5.36	2.23	1	1
207	0	61	0.54	2.58	271.88	1.49	13.96	2.62	13.8	3.44	1	0
208	0	83	0.86	5.99	470.58	1.32	42.64	7.4	13.47	2.64	1	1
209	0	70	2.01	2.28	76.2	2.29	27.33	3.72	32.8	13	1	0
210	0	53	0.61	2.67	320	1.84	12.85	6.02	3	1.86	1	0
211	0	36	0.88	1.89	185.53	1.29	6.36	1.94	2.31	1.54	1	0
212	0	63	1.26	3.5	66	2.57	7.27	5.16	10.96	2.87	1	0
213	0	67	1.32	2.67	33.65	2.57	13.61	3.84	2.77	1.44	1	0
214	1	36	10	4.42	277.38	48.47	84.65	6.7	400	172.02	1	1
215	0	50	0.24	2.72	80.01	0.68	3.11	1.81	3.11	1	1	0
216	1	80	1.59	2.26	42.27	0.95	7.79	1.75	10.09	2.83	1	0
217	1	65	0.24	2.28	145.07	0.52	5.28	9.49	4.9	3.09	1	0
218	0	62	2.02	3.52	6.12	0.69	3.76	2.37	16.93	6.49	1	0
219	0	66	0.24	1.7	49.84	1.42	6.5	7.46	6.08	3.15	1	0
220	1	55	1.9	2.22	107.16	0.82	7.26	15.14	7.28	3.58	1	0
221	0	77	2.86	1.41	12	19.7	5.76	1.69	3.51	2.13	1	0
222	0	46	1.42	1.86	12.05	1.11	7.02	2.67	5.73	1.98	1	0
223	0	73	1.24	4.24	214.25	8.8	5.47	5.47	81.02	31.01	1	0
224	1	70	2.44	4.14	220.27	2.06	15.09	6.57	72.89	9.74	1	1
225	0	70	0.49	2.05	27.65	0.94	2.63	4.54	11.02	2.94	1	0
226	0	59	1.25	2.48	286.85	5.12	46	3.62	30.73	10.28	1	1
227	1	39	1.44	2.73	5.05	0.56	16.12	17.43	8.23	3.34	1	0
228	0	73	1.97	4.46	125.48	0.98	8.27	5.93	4.17	2.18	1	0
229	1	69	0.66	2.76	185.64	1.26	35.53	15.26	7.92	4.03	1	1
230	0	80	3.69	2.81	39.11	5.37	4.14	4.64	8.97	3.73	1	0
231	0	57	3.22	2.95	179.9	13.88	113.84	12.28	5.23	3.1	1	0
232	1	42	0.91	2.04	65.69	1.09	8.24	3.22	10.76	4.08	1	0
233	0	59	3.72	2.48	24.27	3.5	7.19	5.74	108.49	43.23	1	0
234	0	50	0.65	1.99	186.17	0.7	6.2	2.44	4.87	1.72	1	0
235	0	76	2.58	2.73	14.99	5.23	4.7	6.72	37.51	9.62	1	0
236	1	47	1.68	1.51	6.26	1.07	8.15	5.48	6.61	3.33	1	0
237	0	79	8	3.78	269.4	60	26.38	9.25	281.93	61.49	1	1
238	0	64	0.83	2.3	185.07	1.37	11.52	3.63	5.7	2.31	1	0
239	0	71	1.25	2.4	160.49	2.18	7.36	4.26	5.15	2.07	1	0
240	1	65	1.33	3.12	57.36	0.79	4.38	2.02	15.32	3.39	1	0
241	0	78	5.35	3.18	15.38	5.89	32.97	2.75	202.23	64.96	1	1
242	0	53	1.28	2.21	144.99	2.81	5.83	3.71	3.79	1.75	1	0
243	1	71	1.52	2.5	52.82	1.74	4.24	3.12	9.6	2.65	1	0
244	0	69	1.26	2.41	20.62	0.78	3.37	2.51	15.26	6.41	1	0
245	0	62	2	2.8	40.41	1.34	3.53	2.48	10.67	2.14	1	0
246	1	75	1.16	2.26	52.32	2.1	12.84	10.29	7.09	3.01	1	0
247	0	50	1.42	2.47	175.54	2.35	6.15	4.37	5.8	2.86	1	0
248	0	79	3.67	2.72	11.96	2.06	12.16	9.53	26.21	5.45	1	0
249	1	71	1.79	2.99	120.33	1.25	6.09	3.84	7.32	2.86	1	0
250	0	75	14.81	11.28	24.29	60	106.35	3.25	10.55	6.57	1	1
251	0	74	1.89	2.84	80.07	1.09	5.88	3.65	9.37	3.69	1	0
252	0	60	3	1.53	3.13	1.35	2.51	2.14	20.85	5.89	1	0
253	0	49	0.74	2.07	198.71	0.63	5.83	3.47	2.16	1.64	1	0
254	0	67	1.16	1.93	153.47	0.49	6.48	4.54	9.32	2.59	1	0
255	1	46	2.81	2.82	46.55	3.39	107.31	28.29	400	200	1	1
256	0	55	2.82	3.42	94.29	60	35.12	26.95	244.61	90.56	1	0
257	0	63	2.34	2.62	16.36	21.35	15.85	5.02	340.94	124.21	1	0
258	0	65	170.52	3.27	22.17	1.77	3.48	3.33	12.11	1.94	1	1
259	0	76	152.1	2.52	5.07	3.4	3.87	4.3	12.31	3.36	1	0
260	0	43	0.24	2.09	5.01	0.45	3.82	2.61	6.31	3.68	1	0
261	1	62	235.07	1.52	11.5	1.92	2.9	3.87	27.31	2.21	1	0
262	1	54	0.46	1.84	47.46	3.35	6.06	4.87	2.92	1.42	1	0
263	0	67	3.2	3.12	121.46	2.84	11.11	5.59	17.85	3.59	1	1
264	0	40	1.45	5.82	217.83	58.71	353.94	98.86	335.42	122.14	1	1
265	0	54	0.3	2.57	188.14	0.35	4.46	5.66	7.18	1.7	1	0
266	1	74	0.24	3	261.3	2.41	8.47	6.62	2.37	1	1	0
267	0	75	3.6	4.1	3.37	29.98	9.41	10.96	35.73	13.5	1	0
268	1	70	10	18.65	13.1	14.85	2.34	52.79	2.69	14.88	1	0
269	1	59	0.59	2.51	287.84	0.66	12.53	4.74	9.65	2.28	0
270	1	61	1.76	4.18	287.68	0.78	12.86	5.15	3.74	1.57	0
271	0	38	0.29	2.46	260.17	0.38	8.63	8.22	2	2.17	0
272	1	25	0.24	1.59	59.4	0.55	5.38	9.99	5.5	3.22	0
273	0	23	0.24	2.25	335.53	0.74	19.98	4.11	4	2.64	0
274	0	41	1.55	2.26	163.7	2.87	15.83	17.79	7.06	2.75	0
275	1	56	0.24	1.77	272.65	1.29	8.96	12.95	16.29	6.47	0
276	1	36	0.24	1.81	99.22	0.55	4.98	16.12	3.85	1.92	0
277	0	61	0.49	2.04	123.58	2.45	4.29	20.42	15.63	4.01	0
278	0	30	1.33	2.7	35.47	1.45	26.65	22.76	17.28	6.59	0
279	0	56	0.3	1.9	274.43	0.41	8.33	7.29	3.17	1.8	0
280	1	25	0.45	1.99	45.8	0.78	9.53	4.08	16.43	6.47	0
281	1	55	1.84	1.96	124.76	1.33	8.18	5.23	10.69	2.03	0
282	0	29	0.24	1.85	420.46	0.52	13.15	28.02	2.66	1.66	0
283	0	43	0.65	1.69	485.74	0.59	10.84	11.54	4.31	1	0
284	0	74	0.35	1.66	51.05	0.28	2.76	10.73	5.14	1	0
285	1	72	0.24	2.18	116.63	0.75	1.7	7.35	4.81	1	0
286	1	52	0.24	1.33	5.24	0.33	19.99	7.3	5.3	1.93	0
287	1	42	1.03	1.63	47.63	0.76	33.05	5	18.96	3.26	0
288	1	45	0.37	3.38	60.45	0.58	3.85	4.32	6.43	1.92	0
289	0	34	0.38	1.48	125.37	0.28	2.95	3.94	4.14	1.64	0
290	1	54	9.18	2.29	75.16	2.64	10.41	5.1	10.13	2.44	0
291	0	48	0.36	1.35	167.78	0.63	5.8	3.29	4.15	1.2	0
292	1	61	0.36	1.32	44.68	0.78	2.13	3.12	2.86	1.27	0
293	1	43	1.31	2.12	10.07	1.07	6.2	5.79	10.26	3.04	0
294	0	71	0.39	2.59	143.64	0.91	7.64	2.98	2.15	2.06	0
295	0	37	0.24	2.02	260.66	1.34	8.09	14.61	2.23	1	0
296	1	40	0.24	1.78	38.99	0.2	4.66	9.67	3.01	1.48	0
297	1	61	0.35	2.37	275.36	0.88	11.81	13.43	7.47	4.21	0
298	0	34	0.94	2.06	110.62	0.53	3.91	2.48	3.1	1.61	0
299	1	48	0.47	1.73	95.96	0.26	4.2	3.26	3.37	1.4	0
300	0	62	0.33	1.58	88.03	1.79	5.12	3.7	10.15	2.37	0
301	1	58	0.43	1.72	61.81	1.68	6.24	13.91	11.69	2.88	0
302	1	32	0.44	2.3	75.18	1.22	9.08	16.27	13.55	3.93	0
303	1	64	0.24	3.29	218.7	0.55	16.21	9.8	7.48	2.03	0
304	0	65	1.03	2.36	260.74	1.19	7.54	4.38	18.82	4.84	0
305	1	46	1.98	1.45	10.31	1.24	6.13	5.04	40.78	24.61	0
306	0	43	0.24	2.19	90.43	1.85	4.58	4.39	2.84	1.61	0
307	0	23	0.68	2.11	309.73	0.8	9.35	16.08	7.99	2.48	0
308	1	46	2.75	1.68	37.19	0.87	7.86	3.41	4.25	2.53	0
309	1	47	1.17	1.74	69.02	0.5	6.68	2.94	4.15	1.46	0
310	0	46	1.53	2.43	116.9	0.6	8.15	14.18	17.38	4.48	0
311	1	23	2.21	1.56	10.8	0.81	6.39	3.83	14.82	6.01	0
312	0	46	0.24	1.72	242.52	0.35	11.47	3.77	2.85	1.76	0
313	0	53	1.76	1.86	255.18	2.06	15.83	7.11	9.4	4.52	0
314	0	52	1.57	2.66	144.9	1.01	8.41	8.65	3.93	2.29	0
315	0	32	1.18	1.8	262.1	0.59	16.24	6.25	3.13	2.55	0
316	1	37	2.15	1.96	183.3	0.56	9.65	9.7	10.05	3.49	0
317	1	64	1.37	1.86	213.42	0.46	9.65	4.19	3.77	2.03	0
318	1	43	2.68	2.14	54.85	1	8.55	6.75	5.16	2.82	0
319	1	44	1.12	2.4	6.76	0.81	11.34	11.85	10.53	2.68	0
320	0	44	1.25	2.28	372.17	1.36	13.78	9.07	25.2	7.08	0
321	1	71	4.09	2.48	58.58	2.19	4.51	6.38	19.8	5.91	0
322	1	27	2.08	3.11	25.92	1.41	8.55	12.34	10.78	4.04	0
323	1	24	1.25	3.38	69.9	1.22	7.01	4.41	14.99	5.79	0
324	1	22	1.77	1.67	35.11	0.94	7.97	2.45	4.58	2.02	0
325	0	47	0.97	2.25	225.62	0.74	9.85	15.74	2.32	1.78	0
326	1	31	0.87	3.45	181.99	1.23	7.03	13.76	5.07	3.34	0
327	1	73	1.04	2.69	191.85	0.63	8.02	26.15	7.57	3.53	0
328	1	45	8.69	2.57	11.23	0.81	147.25	6.8	30.99	4.3	0
329	0	49	1.57	3.16	278.52	1.94	13.1	17.38	11.29	4.89	0
330	1	47	2.48	2.05	20.57	0.66	4.85	5.32	5.61	2.49	0
331	1	51	1.84	3.6	86.89	0.88	7.9	21.79	12.06	4.79	0
332	1	37	0.88	2.01	8.04	0.82	8.43	3.5	8.3	3.38	0
333	1	35	0.86	2.39	7.15	2.24	124.73	3.64	9.04	4.58	0
334	1	63	1.24	2.76	188.94	1.19	7.67	12.99	5.76	3.05	0
335	0	48	1.97	2.18	311.64	1.33	10.2	9.97	4.37	2.38	0
336	0	57	1.69	2.49	320.41	0.9	12.73	21.03	4.09	3.1	0
337	0	46	2.28	2.25	204.9	2.13	9.57	9.69	6.95	4.19	0
338	0	31	2.36	1.95	212.12	3.25	6.47	1.46	14.8	6.96	0
339	0	23	0.76	2.33	265.36	0.57	7.8	4.23	3.05	2.05	0
340	1	73	1.22	2.27	4.3	1.53	4.26	6.55	11.61	3.77	0
341	1	50	1.16	2.74	83.1	0.6	5.38	3.72	4.45	2.08	0
342	1	43	0.89	2.71	58.84	0.7	6.82	4.4	2.99	2.27	0
343	1	46	1.21	3.36	44.15	0.71	6.24	7.24	4.61	2.38	0
344	1	50	1.44	3.66	134.18	1	4.93	6.1	6.66	4.2	0
345	0	56	0.24	2.74	260.74	0.73	5.4	11.92	3.06	1.9	0
346	0	62	0.24	2.27	159.62	0.39	4.42	2.56	2.71	1.23	0
347	1	53	1.25	2.9	120.42	1.12	7.82	5.29	3.56	1.45	0
348	0	48	1.66	2.09	33.09	1.02	6.16	4.19	10.53	3.77	0
349	0	53	1.09	4.2	413.23	3.96	12.06	10.3	13.26	3.03	0
350	0	50	1.6	4.18	266.26	1.42	8.01	9.37	5.38	2.54	0
351	0	55	0.96	2.3	292.01	0.84	6.76	6.43	4.06	2.62	0
352	1	73	1.35	2.66	48.8	2.27	3.02	3.79	3.69	1.55	0
353	1	31	1.06	4.43	33.69	0.58	5.72	7	6.14	2.89	0
354	1	47	1.44	6.16	11.43	0.72	7.35	10.82	11.61	4.11	0
355	1	42	1.32	2.15	143.31	1.54	6.67	4.92	4.29	1.68	0
356	1	23	5.49	2.3	78.57	2.75	9.41	5.59	5.84	2.64	0
357	1	47	2.33	2.79	108.97	1.24	5.87	6.1	10.6	4.45	0
358	0	53	4.61	3.86	428.83	1.02	17.49	5.52	4.93	2.52	0
359	0	47	1.33	2.36	425.53	0.6	13.95	16.68	14.57	5.19	0
360	0	66	3.6	1.76	184.58	1.95	9.89	5.74	10.07	3.19	0
361	0	47	1.76	1.6	143.43	1.6	9.63	15.09	6.13	2.17	0
362	0	25	1.38	2.02	85.22	0.7	5.61	8.47	3.34	3.1	0
363	0	35	1.17	2.84	207.61	0.6	9.7	13.45	5.79	2.38	0
364	0	51	1.66	3.92	371.58	2.12	15.57	33.15	7.17	3.81	0
365	1	47	0.73	3.22	265.84	1.24	7.45	5.15	11.56	5.76	0
366	0	56	2.01	2.67	263.09	0.85	9.11	7.27	5.25	2.44	0
367	0	62	1.01	2.66	376.82	0.8	11.66	5.27	9.4	3.73	0
368	0	50	0.65	2.61	321.27	1.12	8.97	3.83	3.53	2.51	0
369	0	41	2.08	2.44	263.83	0.97	10.56	4.92	2.59	2.34	0
370	0	73	3	3.69	176.75	2.14	5.56	6.69	21.65	3.49	0
371	0	49	0.97	2.46	383.22	1.14	15.78	4.78	16.71	7.38	0
372	0	50	0.66	2.7	273.18	0.87	6.16	3.74	7.47	3.13	0
373	1	49	1.81	3.58	71	1.53	8.79	4.43	14.83	6.57	0
374	1	50	0.97	2.98	70.72	0.82	5.47	13.35	9.87	4.07	0
375	0	50	1.11	3.27	129.06	1.76	11.17	3.54	3.18	1.98	0
376	0	54	0.66	3.49	360.23	0.91	16.82	11.71	11.21	2.33	0
377	0	56	1.29	3.26	146.79	1.69	7.51	5.48	6.99	2.68	0
378	0	44	0.82	4.96	481.02	2.14	9.79	27.91	7.39	3.57	0
379	0	57	0.9	2.36	369.42	1.28	11.62	18.22	7.35	3.05	0
380	1	47	1.01	2.81	288.37	1.25	6.72	5.82	4.98	2.62	0
381	1	53	1.08	6.7	206.81	0.62	5.62	7.01	3.86	2.8	0
382	0	60	1.08	3.8	366.71	0.8	7.11	7.85	7.59	3.43	0
383	1	34	1.38	2.69	4.51	1.83	10.34	10.09	18.84	9.44	0
384	1	48	1.68	3.81	102.36	0.91	7.92	13.25	5.96	3.53	0
385	0	28	1.06	3.88	109.45	1.28	7.5	5.49	4.34	2.65	0
386	0	45	0.86	3.03	444.56	2.27	14	27.02	10.12	2.72	0
387	0	48	1.59	3.59	365.94	1.15	8.32	6.01	5.44	3.01	0
388	1	62	0.86	3.88	321.23	0.62	7.76	5.58	8.28	2.47	0
389	0	44	1.49	4.83	123.78	2.45	6.68	4.86	11.68	2.96	0
390	0	25	2.69	3.63	210.65	1.23	12.3	10.34	5.69	2.85	0
391	1	24	3.16	3.39	64.43	1.14	56.16	4.81	14.11	7.28	0
392	1	63	5.59	4.16	201.58	1.46	9.46	7.28	7.98	4.37	0
393	1	50	1.25	3.57	127.8	0.88	15.81	7.42	13.37	5.49	0
394	1	51	2.28	2.23	17.71	1.56	12.67	24.83	18.7	6.66	0
395	1	58	1.98	2.55	7.58	1.11	10.25	5.5	16.49	3.43	0
396	1	58	1.83	3.03	10.18	1.11	8.27	5.32	9.5	3.21	0
397	0	55	1.46	2.08	125.52	2.15	6.46	18.89	5.67	2.45	0
398	0	44	1.8	3.03	77.76	7.87	9.02	9.24	3.83	1.84	0
399	1	24	2.13	2.3	17.08	0.67	6.12	4.87	6.3	3.13	0
400	1	53	2.13	2.54	66.81	3.68	8.57	24.28	7.13	3.24	0
401	1	48	1.83	2.15	50.06	0.61	11.84	6.5	5.15	3.03	0
402	0	51	1.62	2.21	159.71	1.73	8.9	11.06	5.38	2.53	0
403	0	32	1.4	2.98	138.03	2.31	10.62	9.56	3.05	1.66	0
404	1	30	1.15	2.99	20.1	0.7	17.68	20.54	9.78	2.57	0
405	1	51	3.17	2.06	5.85	2.21	32.74	7.3	6.54	2.04	0
406	1	44	1.76	2.15	23.27	0.84	9.82	14.66	24.49	7.89	0
407	1	51	1.34	2.92	345	0.79	13.96	15.89	10.37	3.46	0
408	1	52	1.22	3.01	118.51	0.58	5.17	3.04	4.69	2.23	0
409	0	21	1.06	2.75	151.76	1.17	7.13	20.02	9.66	4.04	0
410	0	62	1.5	2.31	255	1.69	9.84	15.66	22.76	6.66	0
411	1	54	0.91	2.36	108.9	0.68	7.43	7.39	5.72	3.01	0
412	1	55	1.27	2.11	69.61	1.75	8.43	11.59	14.77	4.86	0
413	1	31	1.18	2.02	88.12	0.63	10.07	5.18	3.86	2.39	0
414	1	38	1.23	3.34	366	1.48	15.35	5.23	8.18	4.14	0
415	1	37	1.98	2.46	8.99	0.89	82.65	3.65	31.18	7.84	0
416	1	48	0.95	2.04	134.99	0.96	12.23	4.15	4.5	2.46	0
417	0	68	1.43	2.17	168.58	4.54	9.46	7.1	1.36	3.65	0
418	0	52	1.26	2.83	173.4	1.67	14.46	21.92	2.12	1.97	0
419	0	63	1.5	2.65	200	3.52	12.37	5.95	13.1	4.94	0
420	1	47	1.19	2.76	50.22	1.05	4.76	4.52	5.78	2.61	0
421	0	40	1.17	2.81	199.85	0.62	11.54	15.03	9.05	3.04	0
422	0	38	0.93	4.35	355	0.94	12.67	16.1	3.64	2.22	0
423	0	47	1.29	3.26	356	1.18	14.94	7.44	11.07	5.24	0
424	1	46	2.18	1.54	3.97	0.38	3.33	9.07	9.52	1.83	0
425	1	37	1.77	4.07	57.84	2.92	8.27	7.14	17.91	8	0
426	0	51	0.89	2.35	376.91	1.31	11.92	7.68	7.76	3.69	0
427	0	51	1.28	2.53	145.65	1.31	6.85	7.35	14.51	8.14	0
428	1	54	3.77	3.09	288	0.97	17.53	9.92	5.43	3.53	0
429	1	64	1.65	2.64	211	10.88	12.66	12.57	5.92	2.85	0
430	1	51	0.87	2.22	140.11	0.79	8.13	14.37	5.59	3.23	0
431	0	35	2.3	4.44	305.05	1.78	15.54	17.12	13.3	4.34	0
432	0	37	0.83	3.62	256.73	0.63	12.01	6.11	4.12	2.47	0
433	0	46	1.31	2.64	181.99	1.67	10.49	4.71	15.69	4.39	0
434	0	56	0.72	3.98	282.74	0.96	10.02	5.64	3.33	2.6	0
435	0	25	0.89	3.42	272.16	0.73	14.65	5.99	4	2.57	0
436	1	58	0.73	3.53	274.8	0.55	9.83	9.34	8.66	2.95	0
437	1	53	1.5	2.61	199.38	1.26	8.36	7.57	14.91	6.58	0
438	1	47	2.3	2.56	25.59	1.37	7.49	6.05	16.88	6.61	0
439	0	37	1.58	2.19	240.67	0.82	10.86	6.94	8.04	3.07	0
440	0	50	7.18	8	108.88	1.05	13.45	7.92	22.86	6.78	0
441	1	60	4.61	3.6	68.21	2.05	5.85	4.12	27.46	9.57	0
442	0	64	1.53	3.4	320	1.64	12.68	5.53	10.59	3.65	0
443	0	66	1.02	3.26	197.36	1.69	12.68	20.7	21.28	6.1	0
444	1	46	9.4	4.1	63.72	4.96	5.66	20.69	27.74	8.79	0
445	0	38	0.45	1.34	34.17	0.23	6.68	1.51	2.4	1.11	0
446	1	29	1.65	2.54	17.43	1.2	4.92	5.8	11.14	4.71	0
447	1	58	2.16	1.66	113.1	0.67	7.4	5.04	6.04	2.87	0
448	1	41	1.29	1.96	7.63	0.77	62.28	20.78	12.77	4.53	0
449	0	88	1.54	4.23	68.9	1.16	6.77	4.46	9.64	3.3	0
450	1	40	1.54	2.08	43.76	0.86	16.61	28.91	14.45	5.57	0
451	1	62	3.34	3.95	291.96	4.05	20.93	24.21	38.04	16.31	0
452	0	55	1.93	3.29	360	3.68	17.08	17.31	11.93	4.27	0
453	0	45	1.83	3.55	174.06	2.08	12.11	3.97	11.93	4.3	0
454	1	42	1.68	2.16	30.27	1.73	5.5	4.34	6.94	3.51	0
455	1	47	1.06	2.67	129.49	1.59	7.13	8.43	6.68	3.67	0
456	1	48	1.37	3.01	24.41	0.77	3.81	2.38	7.62	2.43	0
457	1	64	1.13	3.38	46.15	1.12	4.21	9.68	23.97	9.91	0
458	0	62	1.54	2.73	260	2.63	10.73	4.15	4.35	2.73	0
459	0	48	2.06	2.06	79.45	0.57	5.95	2.67	6.21	2.24	0
460	0	49	0.93	6.02	116.4	1.33	5.48	5.5	7.92	2.89	0
461	1	52	1.75	3.07	200.76	1.94	9.74	7.05	8.25	4.54	0
462	1	83	2.41	2.94	83.84	3.07	8.73	7.4	41.92	6.3	0
463	1	48	0.81	3.09	218	1.31	11.54	24.64	19.09	5.36	0
464	1	66	1.82	3.49	153.96	1.19	6.77	5.91	7.11	3.14	0
465	1	63	3.04	4.18	42.6	1.33	4.93	5.01	8.94	4.27	0
466	1	49	0.24	1.32	46.52	0.2	5.12	4.55	2.33	1	0
467	1	64	0.24	3.3	56.05	1.23	5.12	6.98	9.95	1	0
468	1	53	2.08	4.31	56.16	1.05	8.16	7.67	8.79	4.6	0
469	1	47	1.76	2.59	141.41	2.97	10.89	7.86	3.1	2.03	0
470	0	41	0.24	2.24	469.85	0.81	15.84	75	3.68	1.72	0
471	1	30	0.24	1.5	32.43	0.23	4.43	6.71	46	1	0
472	1	51	0.24	1.6	95.85	0.38	4.43	2.92	2.95	1	0
473	1	39	3.1	3.46	146.56	1.65	26.63	5.67	12.11	3.44	0
474	0	54	0.43	2.35	265.63	1.28	6.7	3.44	10.77	4.16	0
475	0	70	0.54	1.81	152.02	3.05	10.16	15.26	11.49	3.54	0
476	0	49	0.29	5.93	167.14	3.11	5.54	31.46	0.56	4.38	0
477	1	40	0.24	1.93	74.83	0.82	11.72	4.66	7.62	2.66	0
